# Supplementary material
Source: publisher figshare collection journal article supplement (https://gsajournals.figshare.com/articles/dataset/_/7312274)
Supplement: Supplementary file 1 [file 1]

## Sheet: Editing Efficiency
Table S2. Editing efficiency for 112 gene targets.
Gene Target	Cas9 Delivery	# of Guides	# of P0 Plates	Editing Efficiency: Proportion of P0 Plates Producing Integrants with Target Site Cut
C07H6.4 #1	plasmid	1	19	0
C25A1.4 #1	plasmid	1	8	0.625
C25A6.1 #1	plasmid	1	8	0
C25E10.12 #1	plasmid	1	9	0.111111
C34D4.2 #1	plasmid	1	7	0.142857
C50B8.1 #1	plasmid	1	6	0.5
C50D2.5 #1	plasmid	1	6	0.666667
C52B11.5 #1	plasmid	1	8	0.125
cfim-2 #1	plasmid	1	17	0
EEED8.12 #1	plasmid	1	3	0.333333
EEED8.4 #1	plasmid	1	8	0
EEED8.4 #2	plasmid	1	16	0.1875
F11A10.7 #1	plasmid	1	8	0.5
F11A5.3 #1	plasmid	1	5	0.2
flp-32 #1	plasmid	1	12	0.0833333
flp-8 #1	plasmid	1	5	0.2
flp-9 #1	plasmid	1	12	0.166667
H28G03.1 #1	plasmid	1	9	0.222222
K01G5.9 #1	plasmid	1	6	0.166667
kin-24 #1	plasmid	1	17	0.0588235
lgc-10 #1	plasmid	1	5	0.2
lgc-15 #1	plasmid	1	13	0.0769231
lgc-17 #1	plasmid	1	6	0.166667
lgc-31 #1	plasmid	1	6	0.5
lgc-45 #1	plasmid	1	8	0
pqn-82 #1	plasmid	1	23	0
pry-1 #1	plasmid	1	11	0.181818
pqn-82 #2	plasmid	1	6	0.166667
R06C1.4 #1	plasmid	1	17	0
R08A2.2 #1	plasmid	1	7	0.285714
R09B3.2 #1	plasmid	1	14	0
rap-3 #1	plasmid	1	11	0.454545
rsp-4 #1	plasmid	1	3	0.666667
T08B6.5 #1	plasmid	1	9	0.333333
T22C1.1 #1	plasmid	1	21	0
T22C1.1 #2	plasmid	1	8	0.25
T26C12.3 #2	plasmid	1	5	0.4
W04C9.5 #1	plasmid	1	9	0.111111
Y67D8C.3ab #1	plasmid	1	7	0.142857
Y67D8C.3c #1	plasmid	1	5	0.2
Y67D8C.3d #1	plasmid	1	8	0
Y79H2A.4 #1	plasmid	1	7	0.285714
C15A7.2 #1+2	plasmid	2	9	0.111111
C34D4.2 #1+2	plasmid	2	13	0.230769
C52B11.5 #1+2	plasmid	2	17	0.235294
eif-3.G #1+2	plasmid	2	18	0.111111
K02E11.3 #1 to K02E11.7 #1	plasmid	2	22	0
lgc-45 #1+2	plasmid	2	17	0.235294
nspc-9 #1 to nspc-10 #1	plasmid	2	17	0
sel-11 #1+2	plasmid	2	8	0.75
spp-3 #1 to spp-5 #1	plasmid	2	8	0.25
srg-3 #1 to srg-8 #1	plasmid	2	10	0.2
ubc-6 #1+2	plasmid	2	7	0.285714
ubc-7 #1+2	plasmid	2	13	0
Y57G11A.5 #1+2	plasmid	2	16	0
nspc-1 #1 to nspc-7 #1	plasmid	2	24	0.0416667
C52B11.5 #1	protein	1	12	0.5
C13F10.5 #1	protein	1	5	0.6
C24A3.1 #1	protein	1	4	0.25
C34D4.2 #1+2	protein	2	5	1
C52B11.5 #1+2	protein	2	10	0.5
daf-37 #1+2	protein	2	8	0.375
ilys-4 #1+2	protein	2	8	0.25
nspc-16 #1 to 17 #1	protein	2	11	0.454545
C30E1.9 #1+2	protein	2	15	0.333333
F01D4.5 #1+2	protein	2	8	0.5
vamp-8 #1+2	protein	2	8	0.25
ugt-11 #1 to ugt-13 #1	protein	2	18	0.388889
zipt-13 #1+2	protein	2	14	0
zipt-2.1 #1+2	protein	2	8	0.625
C13F10.5 #1+2	protein	2	5	0.4
C24A3.1 #1+2	protein	2	4	0.25
lgc-45 #1+2	protein	2	9	1
nhr-239 #1+2	protein	2	6	0.666667
cey-1 #1+2	protein	2	10	0.7
dpyd-1 #1+2	protein	2	8	0.5
Y18D10A.9 #1+2	protein	2	8	0.875
ugt-9 #1+2	protein	2	22	0.5
twk-18 #1+2	protein	2	10	0.2
mrps-26 #1+2	protein	2	8	0.5
R01B10.6 #1+2	protein	2	8	0.25
B0205.12 #1+2	protein	2	9	0.888889
cfim-2 #2+3	protein	2	8	0.25
Y57G11A.5 #3+4	protein	2	8	0.875
F15D4.2 #1+2	protein	2	10	0.7
C37A2.8 #1+2	protein	2	8	0.625
F17C8.9 #1+2	protein	2	8	0.75
T04A8.6 #1+2	protein	2	8	0.25
F10C1.9 #1+2	protein	2	10	0.2
ubc-7 #3+4	protein	2	9	0.444444
asd-2 #1+2	protein	2	8	0.125
hmgs-1 #1+2	protein	2	7	0.142857
mig-15 #1+2	protein	2	8	0.375
Y69A2AR.32 #1+2	protein	2	8	0.75
Y57G11C.22 #1+2	protein	2	17	0.176471
ZK185.5 #1+2	protein	2	9	0.333333
C06G4.1 #1+2	protein	2	8	0.125
F59G1.4 #1+2	protein	2	8	0.25
igcm-2 #1+2	protein	2	8	0.125
H04D03.3 #1+2	protein	2	8	0.875
zipt-13 #3+4	protein	2	8	0.875
Y57G11C.36 #1+2	protein	2	8	0.125
C29E4.12 #1+2	protein	2	8	0.125
rbd-1 #1+2	protein	2	9	0.111111
lron-9 #1+2	protein	2	8	0.75
lron-10 #1+2	protein	2	8	1.125
F25H2.3 #1+2	protein	2	8	0.375
Iron-6 #1+2	protein	2	8	0.5
F10C5.2 #1+2	protein	2	8	0.25
sas-5 #1+2	protein	2	15	0.2
C49A9.10 #1+2	protein	2	6	0.5
K07H8.9 #1+2	protein	2	8	0.75
hrpk-1 #1+2	protein	2	10	0.5
C48B6.3 #1+2	protein	2	7	0.428571
zipt-11 #1+2	protein	2	9	0.555556
Average - all plasmid				0.199324
Average - all protein				0.462706
